# Supplementary material
Source: Royal Society of Chemistry journal article supplement (doi:10.1039/d6tc00214e)
Supplement: d6tc00214e2.pdf [file d6tc00214e2.pdf]

## **Low-Temperature Quasi-Static Seeded Columnar Grain Growth of Thick Perovskite Films with Minimal Stress for Sensitive X-ray Detection**

Min Yang, Kang Yang, Qiongyao Wang, Zhou Yang\*

Key Laboratory of Applied Surface and Colloid Chemistry, Ministry of Education; Shaanxi Key Laboratory for Advanced Energy Devices; Shaanxi Engineering Lab for Advanced Energy Technology; Institute for Advanced Energy Materials; School of Materials Science and Engineering, Shaanxi Normal University, Xi'an 710119, China

Corresponding author: Zhou Yang

E-mail: [zyang@snnu.edu.cn](mailto:zyang@snnu.edu.cn)

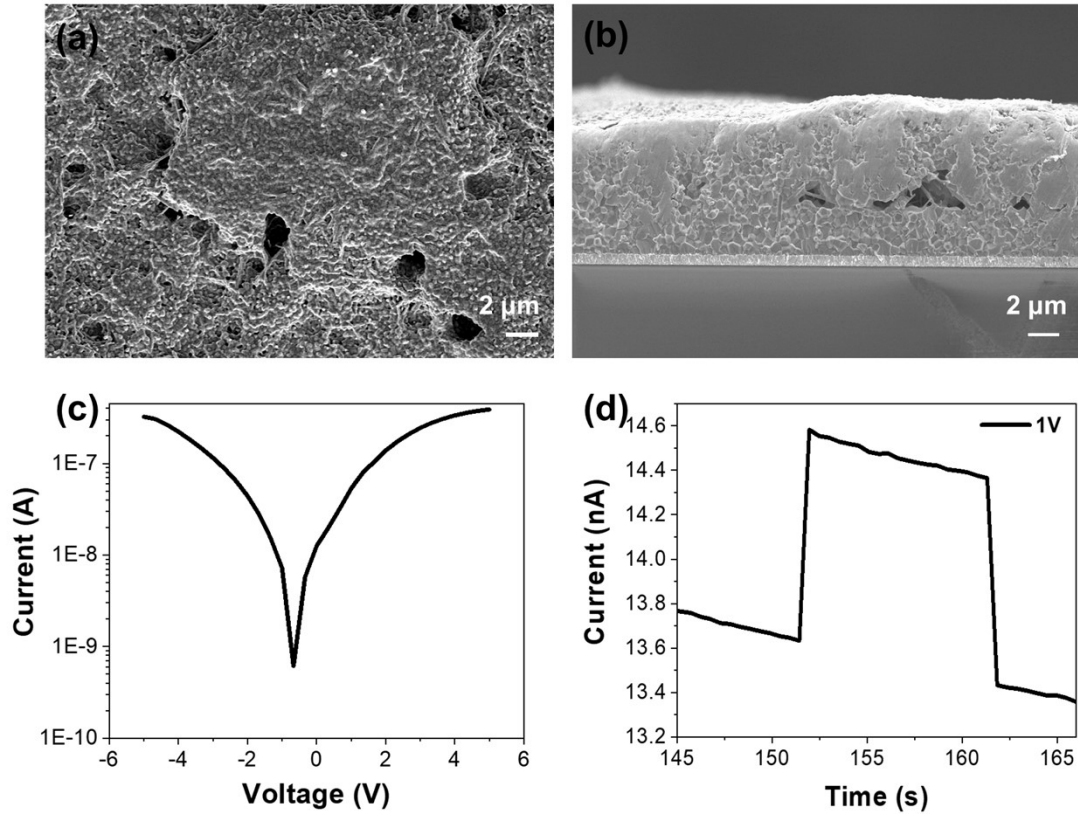

**Fig. S1** The morphologies and X-ray response of MAPbI<sub>3</sub> perovskite thick film prepared using a gas-knife assisted blade-coating process. (a) Surface morphology. (b) Cross-sectional morphology. (c) Dark *I-V* curve. (d) X-ray response current.

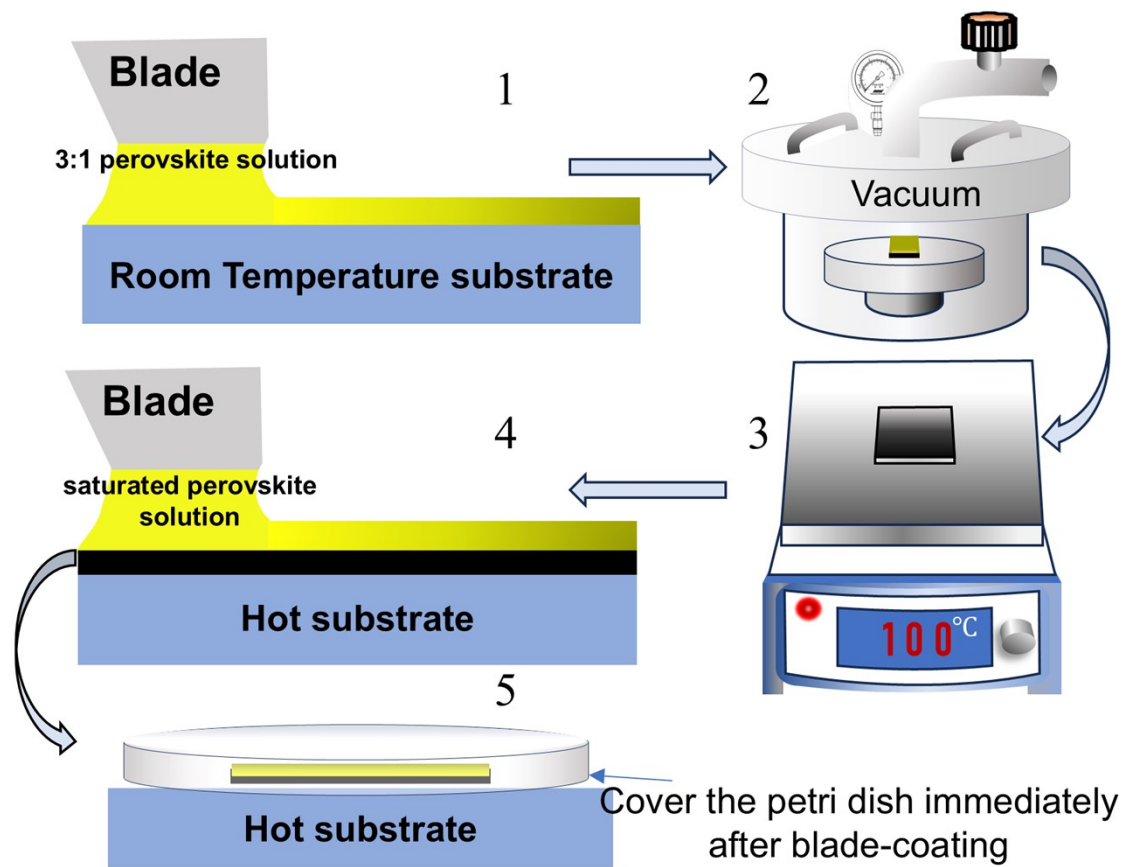

**Fig. S2** Schematic diagram of the preparation process of MAPbI<sub>3</sub> thick film.

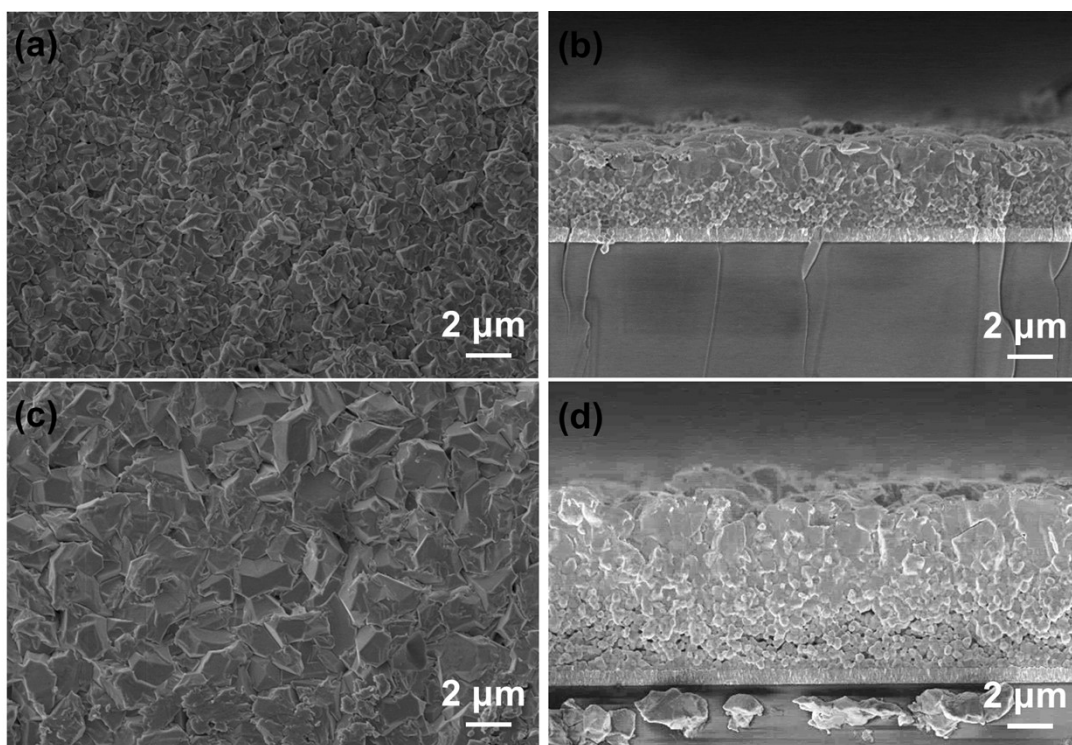

**Fig. S3** The morphologies of perovskite films prepared by using a 2.0 M precursor solution with a substrate temperature 40 °C and different blade-coating cycles. (a-b) Two blade-coating cycles. (c-d) Three blade-coating cycles.

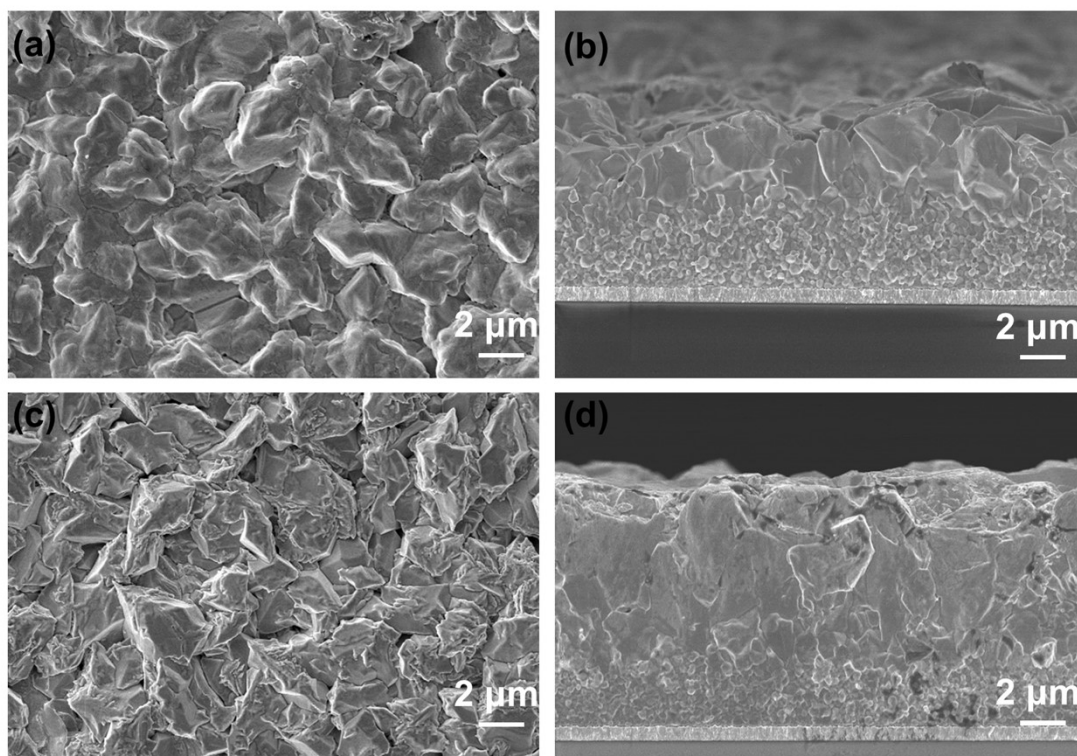

**Fig. S4** The morphologies of perovskite films prepared by using a 2.5 M precursor solution with a substrate temperature 40 °C and different blade-coating cycles. (a-b) Two blade-coating cycles. (c-d) Three blade-coating cycles.

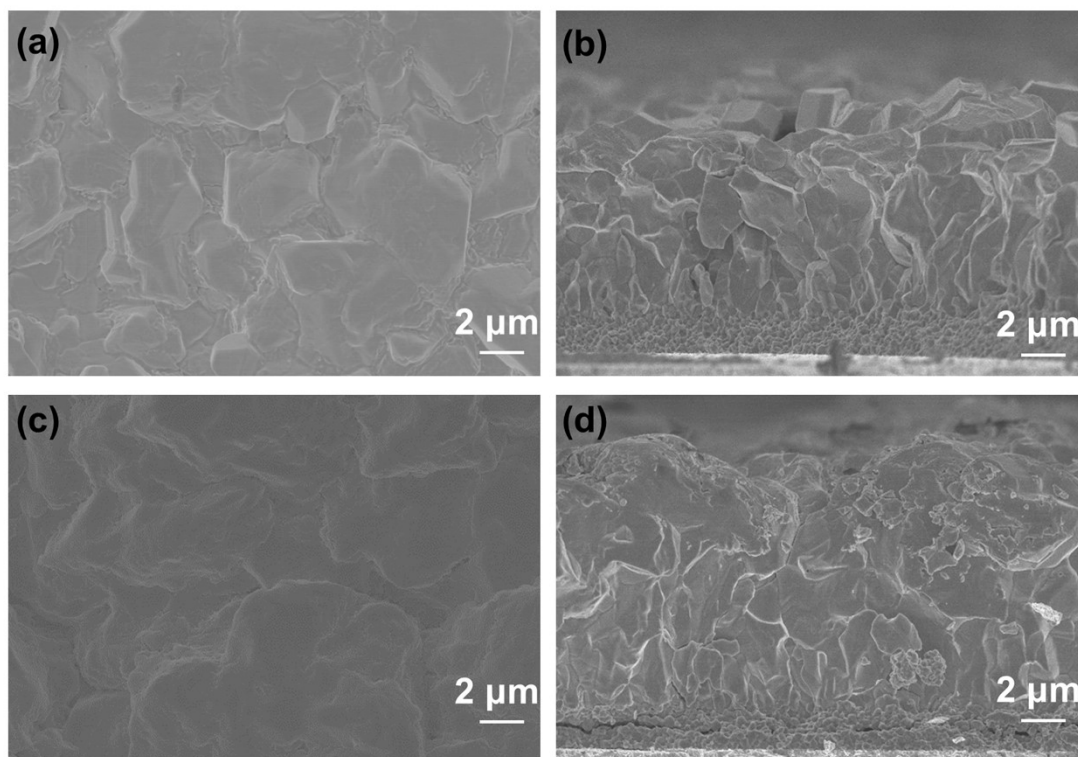

**Fig. S5** The morphologies of perovskite films prepared by using a 3.0 M precursor solution with a substrate temperature 40 °C and different blade-coating cycles. (a-b) Two blade-coating cycles. (c-d) Three blade-coating cycles.

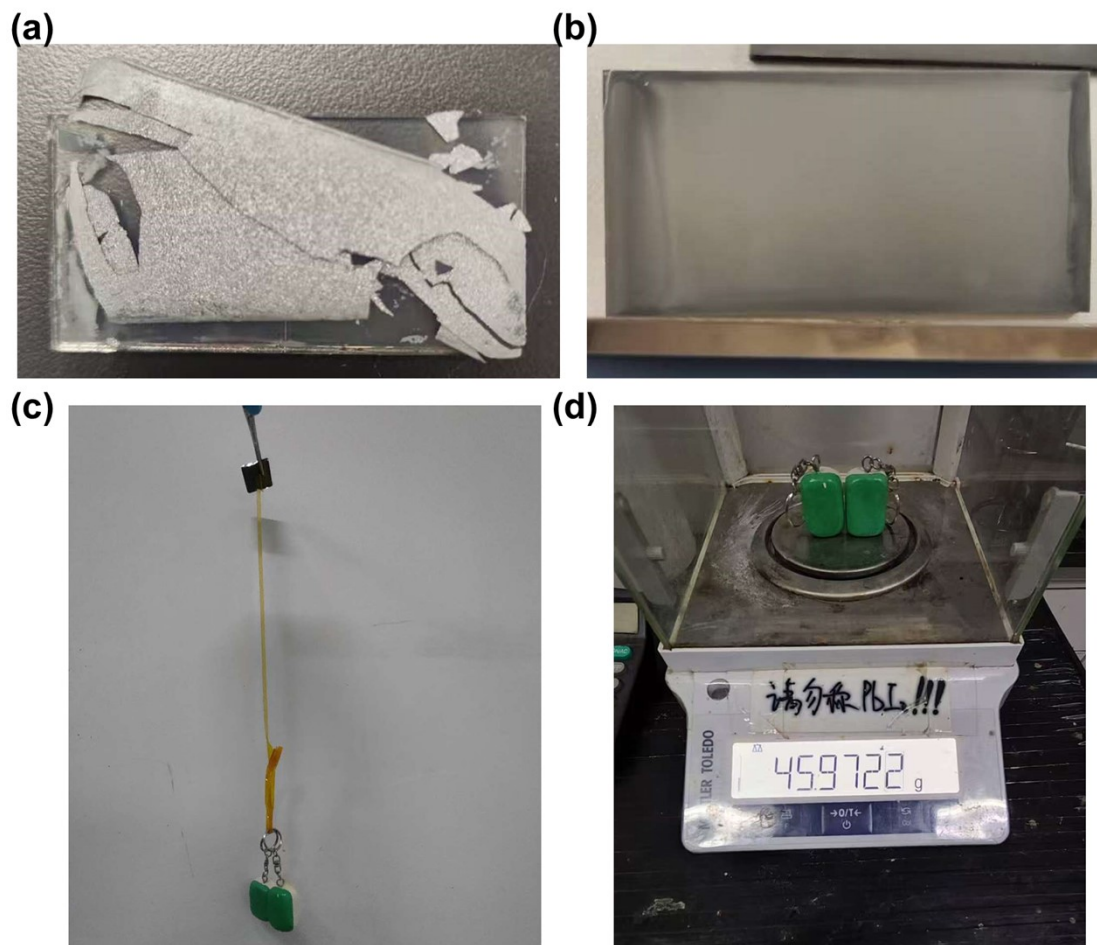

**Fig. S6.** (a) The optical picture of perovskite thick film annealed under 100 °C. (b) The optical picture perovskite thick film prepared at 40 °C. (c-d) The optical picture of thick perovskite film prepared at 40 °C hang with a ~46g weigh on its surface.

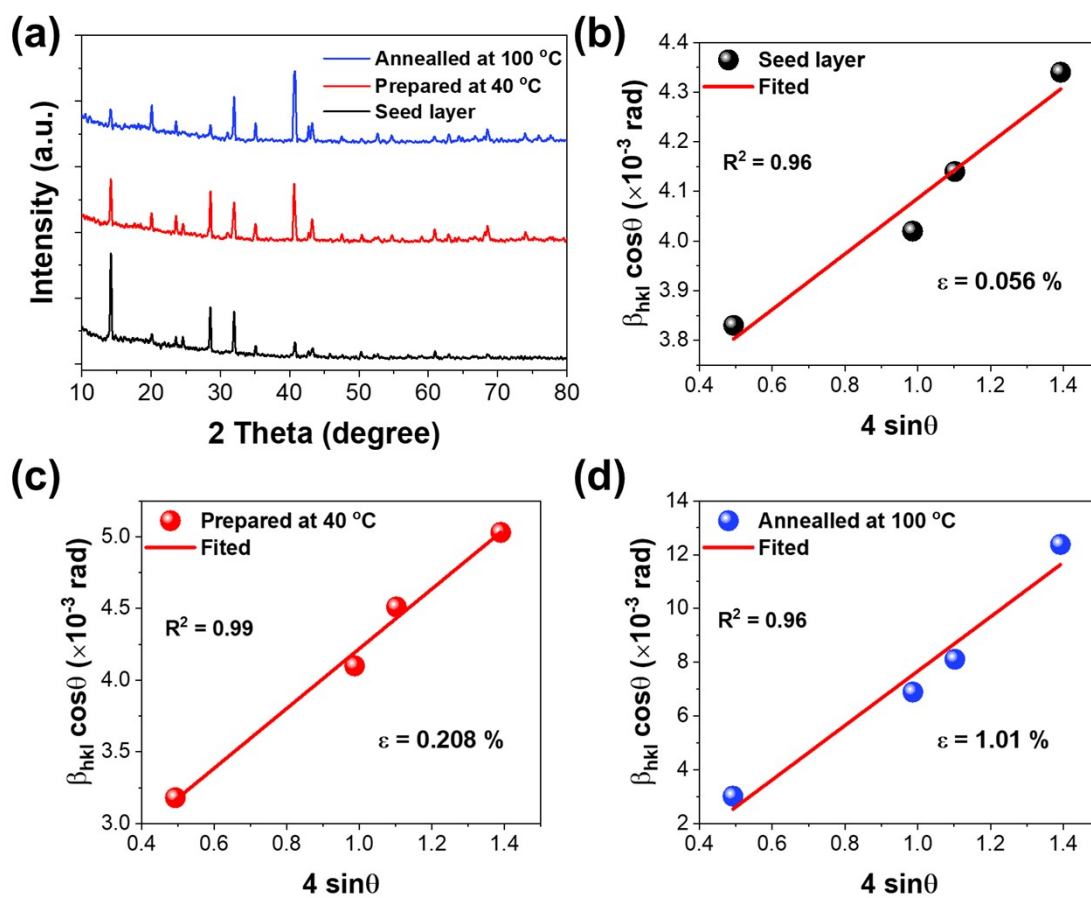

**Fig. S7.** Characterization of microstrain in MAPbI<sub>3</sub> perovskite films prepared under different conditions: (a) X-ray diffraction (XRD) patterns of MAPbI<sub>3</sub> perovskite films prepared under different conditions, including the seed layer, the thick film prepared at 40 °C and the thick film annealed at 100 °C. The microstrain analysis of perovskite films by using Williamson–Hall method for (b) the seed layer, (c) thick film prepared at 40 °C and (d) the thick film annealed at 100 °C.

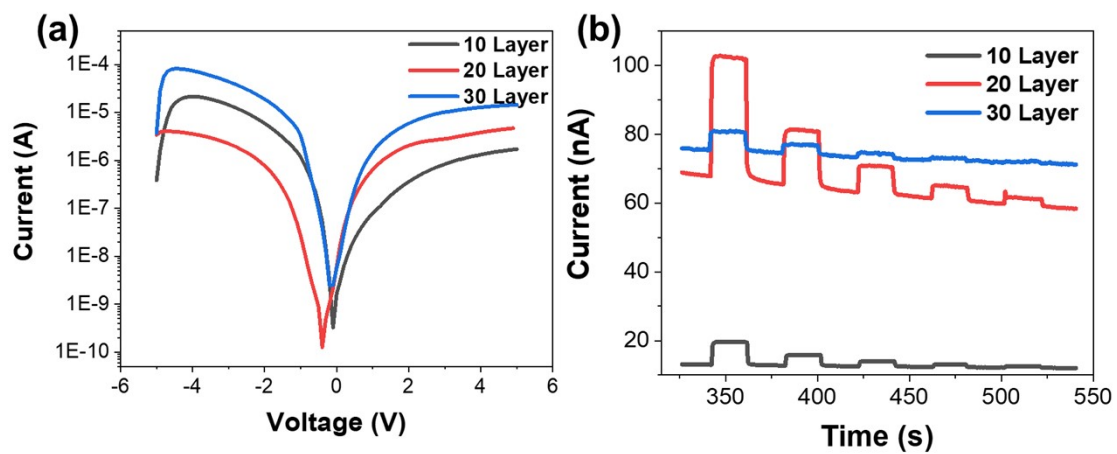

**Fig. S8** (a) The dark I-V curve and (b) X-ray response of perovskite films prepared by different blade-coating cycles.

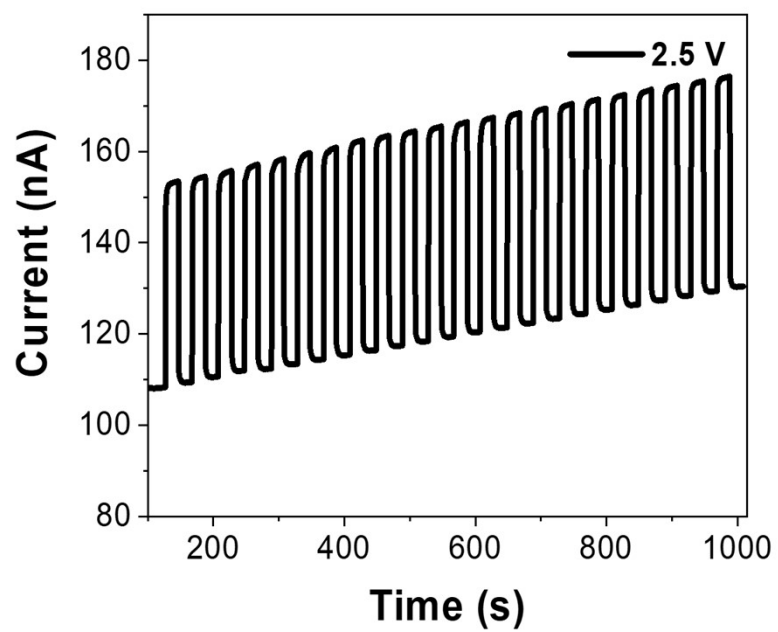

**Fig. S9** Stability test of the X-ray detector under repeated on/off X-ray irradiation.

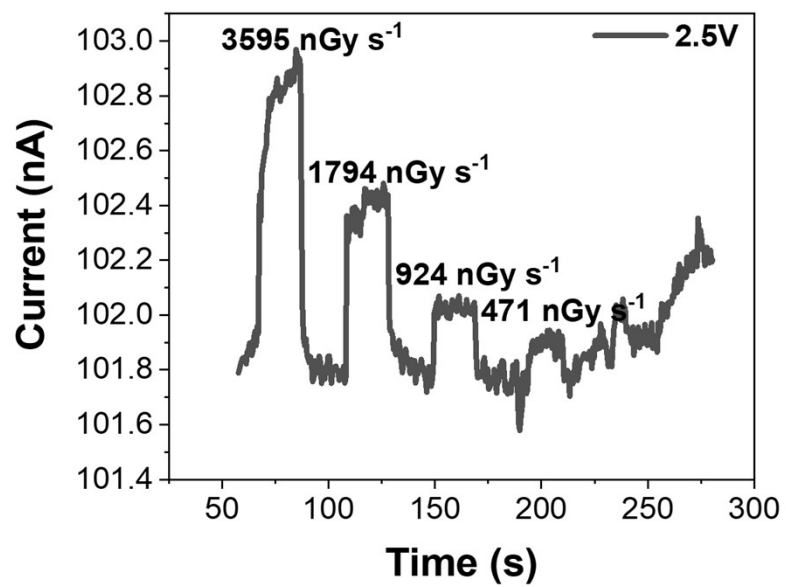

**Fig. S10** Current response of the detector based on 20-cycle thick perovskite film to low dose rate X-ray.

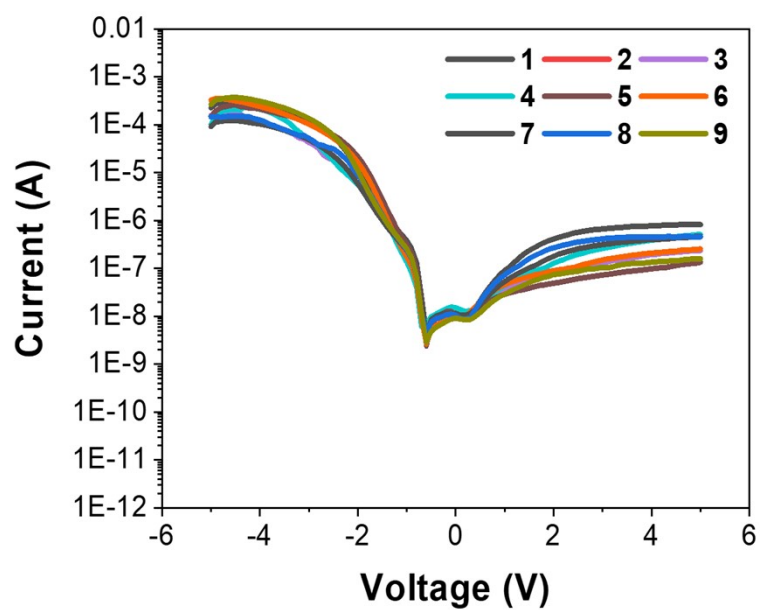

**Fig. S11** Characterization the spatial uniformity of a 5 cm  $\times$  5 cm perovskite film-base X-ray detector by measure its dark  $I$ - $V$  curves at different positions.

**Table S1** Performance comparison of MAPbI<sub>3</sub> perovskite-based X-ray detector in the literature.

| Perovskite morphology       | Device structure                                          | Film thickness ( $\mu\text{m}$ ) | Sensitivity ( $\mu\text{C Gy}_{\text{air}}^{-1} \text{cm}^{-2}$ ) | Detection limit ( $\text{nGy}_{\text{air}} \text{s}^{-1}$ ) | References |
|-----------------------------|-----------------------------------------------------------|----------------------------------|-------------------------------------------------------------------|-------------------------------------------------------------|------------|
| Polycrystalline thick film  | FTO/MAPbI <sub>3</sub> /C                                 | 100                              | 7304                                                              | 154                                                         | 1          |
| Polycrystalline thin film   | ITO/SnO <sub>2</sub> /MAPbI <sub>3</sub> /Ag              | 19                               | 2600                                                              | 11                                                          | 2          |
| Microcrystalline thick film | ITO/PEDOT:PSS/MAPbI <sub>3</sub> /C <sub>60</sub> /BCP/Cu | 400                              | 35500 (0V)                                                        | 4.35                                                        | 3          |
| Polycrystalline thick film  | ITO/MAPbI <sub>3</sub> /C                                 | 110                              | 2751.25                                                           | 15.1                                                        | 4          |
| Polycrystalline thick film  | FTO/MAPbI <sub>3</sub> /Au                                |                                  | 35900                                                             |                                                             | 5          |
| Polycrystalline thick film  | MAPbI <sub>3</sub> /ACA/ $\alpha$ -Si TFT                 | 721.3                            | 19800                                                             |                                                             | 6          |
| Polycrystalline thick film  | ITO/MAPbI <sub>3</sub> /Au                                | 300                              | 20600                                                             | 107                                                         | 7          |

## References

1. W. Qian, W. Qiu, S. Yu, D. Huang, R. Lei, X. Huang, S. Xiao, X. Wang and S. Yang, *Nanoscale*, 2023, **15**, 6664-6672.
2. Y. Hua, J. Chen, C. Guo, S.-C. Chen, Y. He and H. Yang, *J Mater Chem C*, 2025, **13**, 9365-9373.
3. N. Liu, H. Liu, X. Li, N. Li, X. Zhang, Y. Fang and Z. Chen, *J Mater Chem A*, 2025, **13**, 9933-9941.
4. J. Yu, Y. Luo, N. Tian, Z. Yang, Y. Deng, L. Li, R. Zheng, C. Wang and S. Liu, *J Mater Chem C*, 2025, **13**, 8615-8622.
5. S. Kuang, Z. Chen, G. Huang, M. Liao, G. Zheng, Y. Xu, T. Bu, G. Luo, X. He, G. Niu and M. Xia, *Nano Research*, 2025, DOI: 10.26599/NR.2026.94908380.
6. Z. Liu, H. Wu, H. Yang, Z. Song, X. Du, X. He, W. Xiang, Y. Shi, J. Pang, L. Xu, Z. Zheng, Y. Zhang, J. Tang and G. Niu, *ACS Energy Lett*, 2024, **9**, 1397-1404.
7. Z. Fan, B. Zhou, X. Lu, S. Tie, R. Yuan, S. Dong, A. Zhang and X. Zheng, *Device*, 2025, **3**, 100617.
